# Supplementary material for: A dynamic nano-coordination protein hydrogel for photothermal treatment and repair of infected skin injury
Source: Royal Society of Chemistry journal article supplement (doi:10.1039/d2tb01146h), 2022-01-01
Supplement: d2tb01146h1.pdf [file d2tb01146h1.pdf]

*Electronic Supplementary Information (ESI)*

## **Dynamic Nano-Coordination Protein Hydrogel for Photothermal Treatment and Repair of Infected Skin Injury**

Weiling Yin,<sup>a†</sup> Qiang Wang,<sup>b†</sup> Jinyi Zhang,<sup>a</sup> Xu Chen,<sup>a</sup> Yunlong Wang,<sup>a</sup> Zhenhuan Jiang,<sup>b\*</sup> Miao Wang,<sup>a\*</sup> and Guoqing Pan<sup>a\*</sup>

<sup>a</sup> Institute for Advanced Materials, School of Materials Science and Engineering, Jiangsu University, 301 Xuefu Road, Zhenjiang, Jiangsu, 212013 China.

E-mail: [wangmiao@ujs.edu.cn](mailto:wangmiao@ujs.edu.cn) (Miao Wang); [panguoqing@ujs.edu.cn](mailto:panguoqing@ujs.edu.cn) (Guoqing Pan).

<sup>b</sup> Department of Orthopaedics, People's Hospital of Yixing City, the Affiliated Yixing Hospital of Jiangsu University, Yixing, Jiangsu 214200, P. R. China.

## ***Materials***

Gelatin was obtained from porcine skin (Gelatin, Sigma). It was dissolved by the mixture of Ethylenediaminetetraacetic acid disodium salt (EDTA-2Na, Macklin) and Phosphate buffer solution (PBS, 98%, REBIO), then mercaptoized by 2-Iminothiolane hydrochloride (Traut's Reagent, 98%, Aladdin). Copric chloride dihydrate ( $\text{CuCl}_2 \cdot 2\text{H}_2\text{O}$ , Aladdin), Trisodium citrate dihydrate ( $\text{C}_6\text{H}_5\text{Na}_3\text{O}_7 \cdot 2\text{H}_2\text{O}$ , SCR), Sodium sulfide nonahydrate ( $\text{Na}_2\text{S} \cdot 9\text{H}_2\text{O}$ , Adamas) were used as raw materials.  $\text{CuS}_2$  NPs were prepared according to previous literature [1]. Cell Counting Kit was purchased from Shanghai Biyuntian Biotechnology Co., LTD. AO/PI Staining Kit was bought from Beijing Solai Biological Technology Co., LTD. Masson's Trichrome staining was bought from Shenzhen Zike Biotechnology Co., LTD. Other chemical reagents used in the experiments were all analytically pure and without further purification before use. Phosphate buffer solution (PBS, 0.02mmol/L, pH=7.2) was prepared by dissolving the phosphate buffer salt into the ultra-pure water (Thermo Scientific Barnstead NANOpure Diamond Water Purification Systems, minimum resistivity: 18.2  $\text{M}\Omega \cdot \text{cm}$ ).

## ***Preparation of $\text{CuS}_2$ NPs hydrogel***

PBS powder and EDTA-2Na were dissolved in 100mL deionized water ( $\mu_{\text{PBS}}/\mu_{\text{EDTA-2Na}} = 10:1$ ) to obtain the PBS-EDTA-2NA solution. 1g gelatin was added to the PBS-EDTA-2NA solution (pH=8.0) and heated in water bath (50°C) to dissolve completely. After that, 32 mg Traut's Reagent were mixed with the gelatin solution and stirred for 2-3 h. Mercapto gelatin (Gel-SH) was obtained after dialyzed and lyophilized.  $\text{CuCl}_2 \cdot 2\text{H}_2\text{O}$  (17.8 mg) and  $\text{C}_6\text{H}_5\text{Na}_3\text{O}_7 \cdot 2\text{H}_2\text{O}$  (22.8 mg) were dissolved in 14 mL deionized water. Subsequently,

Na<sub>2</sub>S·9H<sub>2</sub>O (24 mg) was added into the aqueous solution. The color of solution experienced from the original light blue, yellow, and finally green, indicating the product of CuS<sub>2</sub> NPs aqueous solution, in room temperature<sup>[1]</sup>.

For the preparation of CuS<sub>2</sub> NPs hydrogel, Gel-SH (40 mg) was dissolved to PBS solution (10 mM, 300 μL) with water bath of 50 °C. CuS<sub>2</sub> NPs hydrogel was gelled by dropping CuS<sub>2</sub> NPs aqueous solution (200 μL) into the fully dissolved sulfhydryl gelatin solution in a vortex agitator.

### ***Structure and morphological characterization***

The morphology of CuS<sub>2</sub> NPs was observed by transmission electron microscopy (TEM, FEI Talos F200s).

The morphology of CuS<sub>2</sub> NPs hydrogels was observed by scanning electron microscope (SEM, FEI NovaNano450).

### ***Biodegradability of CuS<sub>2</sub> NPs hydrogel***

The biodegradability of CuS<sub>2</sub> NPs hydrogel was studied by gravimetric method. The biodegradability of CuS<sub>2</sub> NPs hydrogel could be scaled by the formula below:

$$DR = (W_0 - W_1) / W_0 = 1 - W$$

Where, DR is the degradation rate, W<sub>0</sub> is the initial weight of the freeze-dried hydrogel, W<sub>1</sub> is the weight of the freeze-dried hydrogel which do not change after freeze-drying and soaking

cycle,  $W$  is the weight ratio of  $W_1$  to  $W_0$ . And the biodegradability of  $\text{CuS}_2$  NPs hydrogel was plotted according to the weight ratio.

### ***Injectability and self-healing property***

The injectability of  $\text{CuS}_2$  NPs hydrogel was carried out by syringe (needle diameter: 22G). The hydrogel was extruded continuously. Self-healing feature of hydrogel was observed by cutting and splicing the hydrogel with staining. The hydrogel was cut into four squares by blade, then put together without external strain to verify its self-healing ability. Two of them placed diagonally were dyed to orange to distinct.

### ***Rheological properties***

Rheology measurement was carried out using a parallel plate (40 mm Peltier plate Steel) by a rheometer AR2000Ex (TA Instruments). And  $\text{CuS}_2$  NPs hydrogel was cut into cylinders with a diameter of 2 cm and a thickness of 0.3 cm for testing. The shear storage ( $G'$ ) and shear loss moduli ( $G''$ ) were obtained (constant deformation: 1%, constant temperature: 37°C). The changes of  $G'$  and  $G''$  of hydrogel were observed when the shear frequency was from 0.1 rad/s to 100 rad/s. The changes of  $G'$  and  $G''$  in the critical strain region and linear viscoelastic region were observed to determine the critical strain value of the hydrogel transition from gel to sol state (shear frequency: 10rad/s, dynamic strain: 0.1% to 2000%). In order to study the self-healing properties of hydrogels, the changes of  $G'$  and  $G''$  of hydrogels were studied under alternating oscillating strains of 1% and 2000% (low strain 1%, 60 s, high strain 2000%, 60 s).

### ***Photothermal performance***

All samples (540  $\mu\text{L}$ ) were prepared in a 1.5 mL centrifuge tube and irradiated with an 808nm NIR laser for 10 min. The photothermal efficiency of  $\text{CuS}_2$  NPs solutions and hydrogel were studied by adjusting laser intensity (1.0, 1.5, 2.0, 2.5  $\text{W}/\text{cm}^2$ ). Thermal images were taken with an infrared thermometer. And the photothermal conversion efficiency was calculated. The photothermal stability of  $\text{CuS}_2$  NPs hydrogel was studied by four switching laser cycles.

### ***Cytotoxicity test***

The Sterile hydrogels (diameter: 14 mm, thickness: 1mm) were directly contacted with L929 cells to cocultured in 24-well plates for 24 h. Live/dead viability assay was carried out to further evaluate the cytotoxicity of samples. After cocultured, the live and dead cells were stained with AO (green, 20  $\mu\text{g}/\text{mL}$ ) and PI (red, 15  $\mu\text{g}/\text{mL}$ ) under dark conditions for 30min. Fluorescence images were taken under a fluorescence microscope.

Cell Counting Kit (CCK)-8 was used on the cells and absorbance was measured at 450nm.

The cell viability was calculated as:

$$\text{Cell viability (\%)} = \text{OD}_{450\text{sample}} / \text{OD}_{450\text{control}} \times 100\%$$

### ***In vitro antibacterial activity of $\text{CuS}_2$ NPs hydrogel***

Six groups of samples were prepared. These are two groups of PBS (400  $\mu\text{L}$ ) mixed with Escherichia coli (*E.coli*) suspension(1mL,  $1 \times 10^4$  CFU/mL), two groups of  $\text{CuS}_2$  NPs solution (400 $\mu\text{L}$ ) mixed with *E.coli* suspension(1mL,  $1 \times 10^4$  CFU/mL), and two groups of  $\text{CuS}_2$  NPs protein hydrogels leaching solution (400  $\mu\text{L}$ ) mixed with *E.coli* suspension(1mL,

1×10<sup>4</sup>CFU/mL). The samples were placed in a shaker under the rotation speed of 160 r/min at 37 °C for 12 h. Then one of the two same samples were irradiated for 10min under a 2.0 W/cm<sup>2</sup> 808nm NIR laser. 0.1 mL suspension sample was evenly coated on AGAR plates, and each suspension sample was coated on three AGAR plates. Finally, the coated AGAR plates were placed in a biological incubator at 37 °C for 24 h, and counted. The antibacterial performance of each sample against *Staphylococcus aureus* (*S.aureus*) suspension (1×10<sup>4</sup> CFU/mL) was measured as that of *E.coli*. The antibacterial phenomenon of each sample was observed by optic microscope. The morphology of *E.coli* and *S. aureus* was recorded by SEM after lyophilization.

### ***Hemolysis test***

Hydrogel sample (500 mg) was mixed with the red blood cells (1 mL, 3%) in a centrifuge tube. The samples were incubated with an oscillation speed of 100 rpm for 60min at 37 °C, and then centrifuged at 3500 rpm for 5 min. The absorbance of supernatant at 540 nm was measured with a microplate reader. PBS was the negative control group and deionized water was the positive control group for comparison. The hemolysis percentage of samples was calculated according to the following formula:

$$\text{Hemolysis ratio (\%)} = \frac{(\text{OD}_S - \text{OD}_P)}{(\text{OD}_W - \text{OD}_P)} \times 100\%$$

Where OD<sub>S</sub>, OD<sub>P</sub> and OD<sub>W</sub> represent the absorbances of the hydrogel, PBS and deionized water, respectively.

### ***Antibacterial of CuS<sub>2</sub> NPs hydrogel in rat model***

All the procedures were under the animal protocols licensed by the Animal Care and Use

Committee of Jiangsu University, and the experiments were guarded by the Guide for the Care and Use of Laboratory Animals.

For the antibacterial experiments in vivo, four-month-old SD rats (female) were anesthetized, and the trauma were sculpted on the epidermal surface of the rats, and *Staphylococcus aureus* (*S. aureus*) suspension (100  $\mu$ L,  $1 \times 10^8$  CFU/mL) was injected into the wounds. According to the experimental requirements, the rats were randomly divided into three groups: control group, CuS<sub>2</sub> NPs hydrogel without light control group, CuS<sub>2</sub> NPs hydrogel with light control group (n=8 per group). In CuS<sub>2</sub> NPs hydrogel without light control group, hydrogel was injected into the wound after incision and covered the wound. In CuS<sub>2</sub> NPs hydrogel with light control group, CuS<sub>2</sub> NPs hydrogel was injected into the wound and covered with the wound after incision, and the wound was irradiated by 808nm NIR laser with a power of 2.0 W/cm<sup>2</sup> for 10min. The rats were sacrificed at 7 and 14 days, respectively. The wound tissues were collected and immersed in 4% formaldehyde for hematoxylin and eosin (H&E) staining and Masson staining. The damaged areas were photographed by microscope (DP73, Olympus, Tokyo, Japan) and processed by Image J (V1.53, NIH, Bethesda, USA).

## ***References***

- [1] H.Y. Wang, X.W. Hua, F.G. Wu and B. Li, ACS Appl. Mater. Interfaces, 7, 2015, 7082-7092.

## Figures

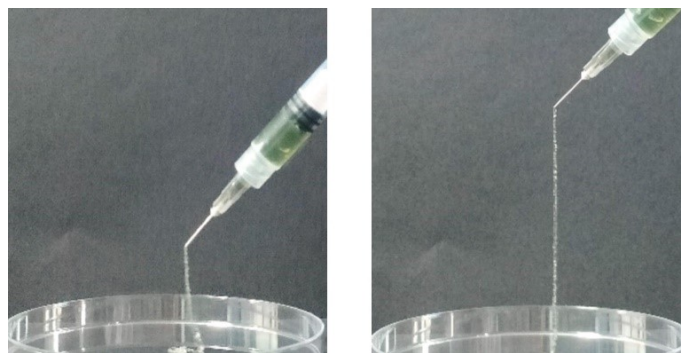

**Figure S1.** Injectable feature of CuS<sub>2</sub> NPs hydrogel through the needle (22G).

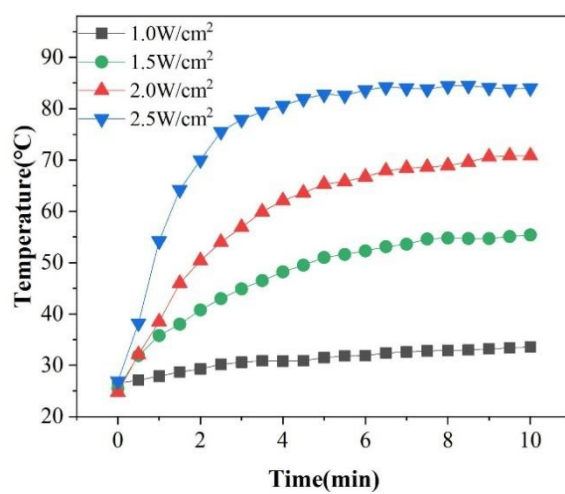

**Figure S2.** Photothermal properties of CuS<sub>2</sub> NPs hydrogel irradiated by near infrared laser under different powers (808nm).



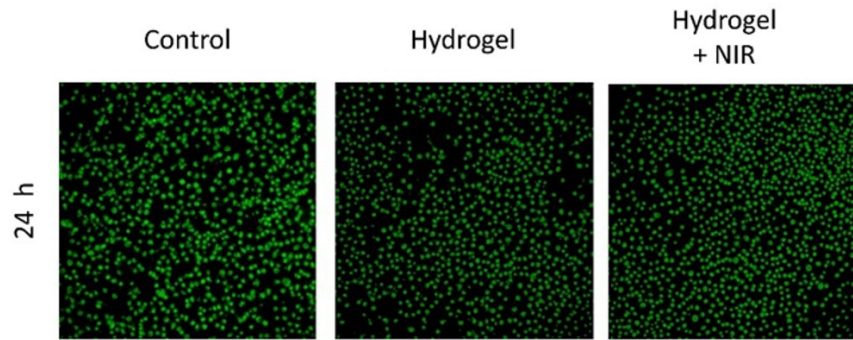

**Figure S3.** Live/dead cell-staining (L929) after incubation with hydrogel for 24h. Note that the NIR irradiation was only last for 4 min.

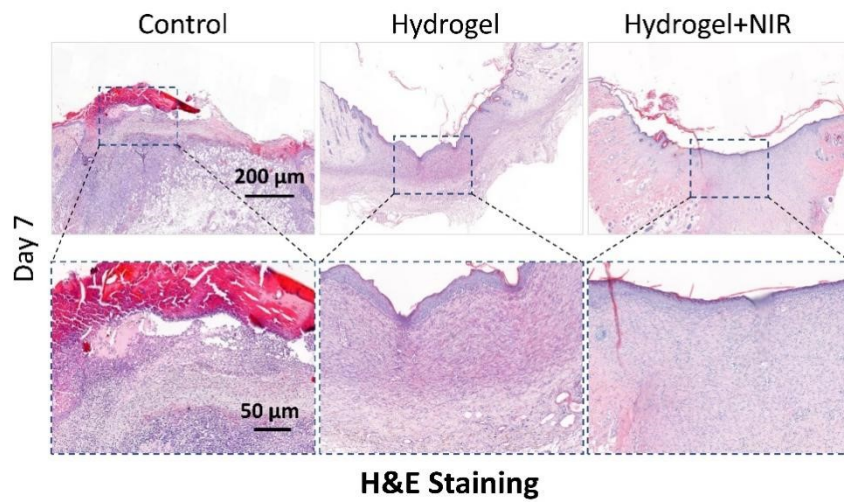

**Figure S4.** H&E staining of infection regions at day 7 after processing.

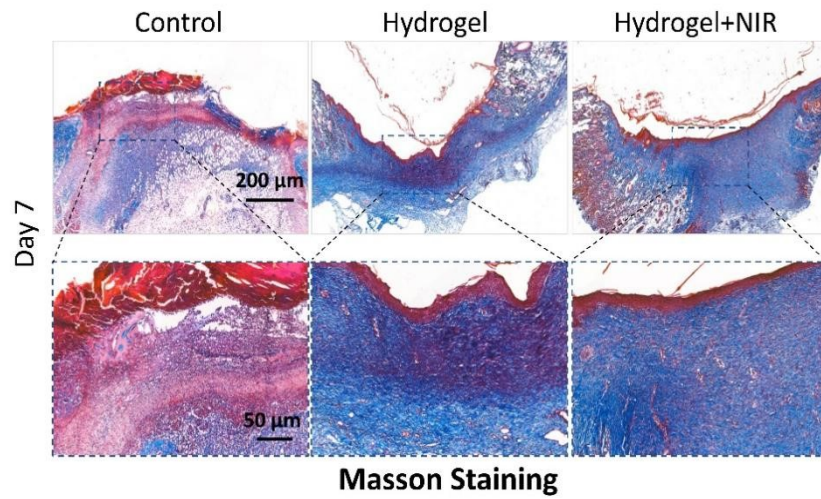

**Figure S5.** Masson staining of infection regions at day 7 after processing.

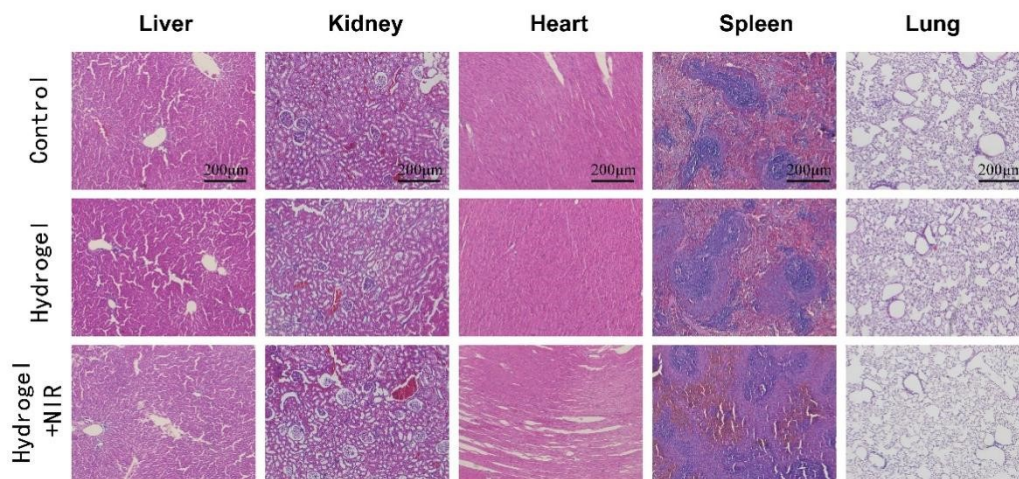

**Figure S6.** H&E staining images of major organs (liver, kidney, heart, spleen and lung) 2 weeks after processing.
